# Supplementary material for: Oxidative desulfurization catalyzed by a novel ZrP/MCM-41 catalyst with high performance
Source: Royal Society of Chemistry journal article supplement (doi:10.1039/d0se00821d), 2020-01-01
Supplement: d0se00821d1.pdf [file d0se00821d1.pdf]

**Oxidative desulfurization catalyzed by a novel ZrP/MCM-41 catalyst with the  
high performance**

Panpan Zhang<sup>b</sup>, Lihua Kang<sup>a,b</sup>, Mingyuan Zhu<sup>a,\*</sup> and Bin Dai<sup>b</sup>

<sup>a</sup> College of Chemistry and Chemical Engineering of Yantai University, Yantai,  
Shandong 264004, PR China.

<sup>b</sup> School of Chemistry and Chemical Engineering of Shihezi University, Shihezi,  
Xinjiang 832000, PR China.

\*Corresponding author at: College of Chemistry and Chemical Engineering of Yantai  
University, Yantai, Shandong 264004, PR China.

E-mail address: [zhuminyuan@shzu.edu.cn](mailto:zhuminyuan@shzu.edu.cn).

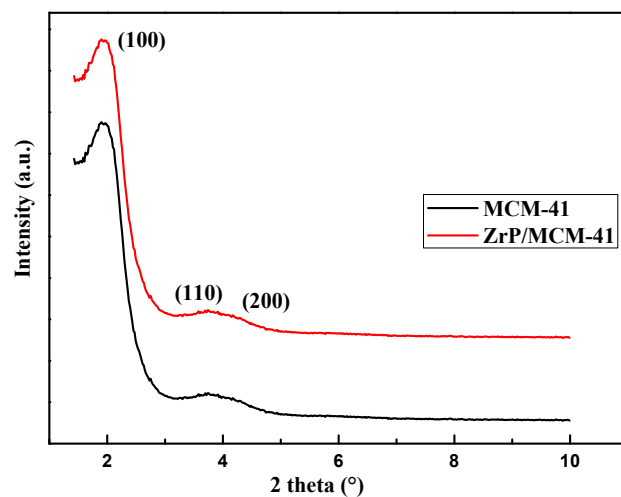

Fig. S1 The small-angle XRD patterns of MCM-41 and ZrP/MCM-41.

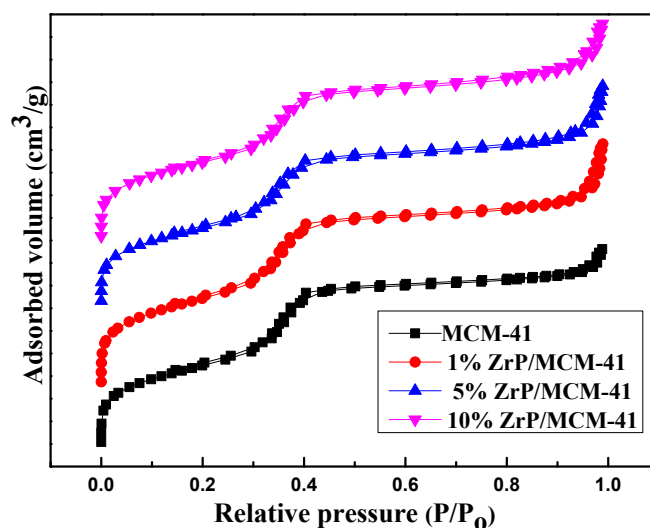

Fig. S2 N<sub>2</sub> adsorption-desorption isotherms of MCM-41 and ZrP/MCM-41 with different loading.

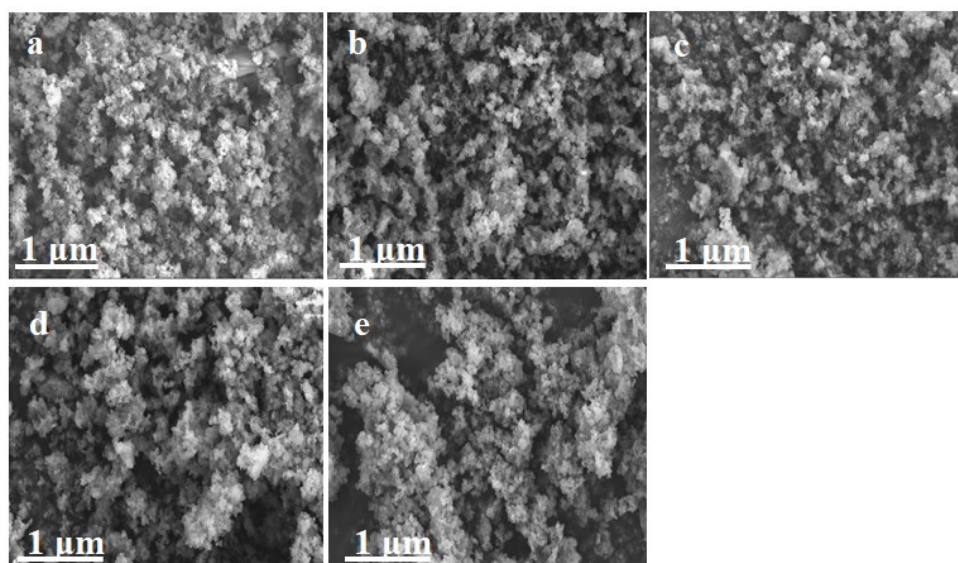

Fig. S3 SEM images of (a) MCM-41, (b) 1% ZrP/MCM-41, (c) 3% ZrP/MCM-41, (d) 5% ZrP/MCM-41 and (e) 10% ZrP/MCM-41.
